# Supplementary material
Source: PubMed Central journal article supplement (PMC5234720)
Supplement: supp_M071738_Supplemental_Material_revised.pdf [file supp_M071738_Supplemental_Material_revised.pdf]

## **SUPPLEMENTAL INFORMATION:**

### **Sweat lipid mediator profiling: a non-invasive approach for cutaneous research**

Karan Agrawal<sup>1,2</sup>, Lauren A. Hassoun<sup>3</sup>, Negar Foolad<sup>3</sup>,

Theresa L. Pedersen<sup>2,4</sup>, Raja K. Sivamani<sup>3</sup>, John W. Newman<sup>1,2,4</sup>

<sup>1</sup> Department of Nutrition, University of California-Davis, Davis, CA 95616, USA

<sup>2</sup> NIH West Coast Metabolomics Center, Davis, CA 95616, USA

<sup>3</sup> Department of Dermatology, University of California-Davis Medical Center, Sacramento, CA 95816, USA

<sup>4</sup> United States Department of Agriculture, Agricultural Research Service,  
Western Human Nutrition Research Center, Davis, CA 95616, USA

## Lipid Mediator Nomenclature

The abbreviated nomenclature for oxylipins described in this study is adopted from the International Union of Pure and Applied Chemistry (IUPAC) based on the recommendations of Smith et al (1, 2). These abbreviations are used in order to improve manuscript readability. Briefly, the numbers prior to the hyphen indicate the positions of the functional group substituent on the fatty acid chain, the first one to three letters of the after the hyphen indicate functional group substituent (e.g. Ep: epoxide, DiH: dihydroxide, Hp: hydroperoxide, H: hydroxide, and K: ketone) and the remaining letters of the abbreviation indicating the fatty acid chain length and degree of unsaturation (e.g. DPE: docosapentaenoate, ETE: eicosatetraenoate, ETrE: eicosatrienoate, ODE: octadecadienoate, and OME: octadecenoate). Examples of this form of nomenclature include the epoxy fatty acid 16,17-epoxydocosapentaenoate which is abbreviated to 16,17-EpDPE, the dihydroxy fatty acid 8,15-dihydroxyeicosatetraenoate which can be reduced to 8,15-DiHETE, the hydroxy fatty acid 15-hydroxyeicosatrienoate which becomes 15-HETrE and the keto fatty acid 9-ketooctadecadienoate which can be abbreviated as 9-KODE. Other common abbreviations of oxylipins used in this study are TX for thromboxanes, LT for leukotrienes and PG for prostaglandins.

Endocannabinoid abbreviated nomenclature has not been standardized by IUPAC, but generally the first letters of the abbreviation refer to the fatty acid precursor (e.g. A: arachidonate, L: linoleate, O: oleate, P: palmitate, S: stearate, aL:  $\alpha$ -linolenate, D: docosatetraenoate, and DH: docosahexaenoate) and the last one to three letters refer to the substituent (e.g. G: glycerol, EA: ethanolamide, and Gly: glycine). Any numbers prior to the abbreviation refer to the position on the substituent to which the fatty acid chain is attached. Therefore 2-arachidonylglycerol can be abbreviated to 2-AG and linoleoylethanolamide can be abbreviated to LEA.

Ceramide nomenclature used in this manuscript generally follows the nomenclature used by Janssens et al (3). Chain lengths (which are preceded by “C”) refer to the length of the fatty acid chain of the ceramides (unless specifically referred to as “total carbons”), and letters in brackets refer to the substituents on the fatty acid and sphingosine chains, respectively. Briefly, fatty acid chains associated with ceramides can either be non-hydroxylated (N),  $\alpha$ -hydroxylated (A) or  $\omega$ -esterified (EO) whereas sphingosine chains may either be unsubstituted (S), dihydro-substituted (dS), 6-hydroxy-substituted (H) or dihydro-hydroxy-substituted (P). Example structures of the various ceramide classes, which better elucidate the nomenclature, may be found in supplemental Fig. S8.

## **References**

1. Smith, D. L., and A. L. Willis. 1987. A suggested shorthand nomenclature for the eicosanoids. *Lipids* **22**: 983-986.
2. Smith, W. L., P. Gorgeat, M. Hamberg, L. J. Roberts II, A. L. Willis, S. Yamamoto, P. W. Ramwell, J. Rokach, B. Samuelsson, E. J. Corey, and C. R. Pace-Asciak. 1990. Nomenclature. *In* Methods in Enzymology. F. A. Fitzpatrick, editor. Academic Press, Inc., San Diego, CA. 1-9.
3. Janssens, M., J. van Smeden, G. S. Gooris, W. Bras, G. Portale, P. J. Caspers, R. J. Vreeken, T. Hankemeier, S. Kezic, R. Wolterbeek, A. P. Lavrijsen, and J. A. Bouwstra. 2012. Increase in short-chain ceramides correlates with an altered lipid organization and decreased barrier function in atopic eczema patients. *J. Lipid Res.* **53**: 2755-2766.

## Supplemental Figure S1

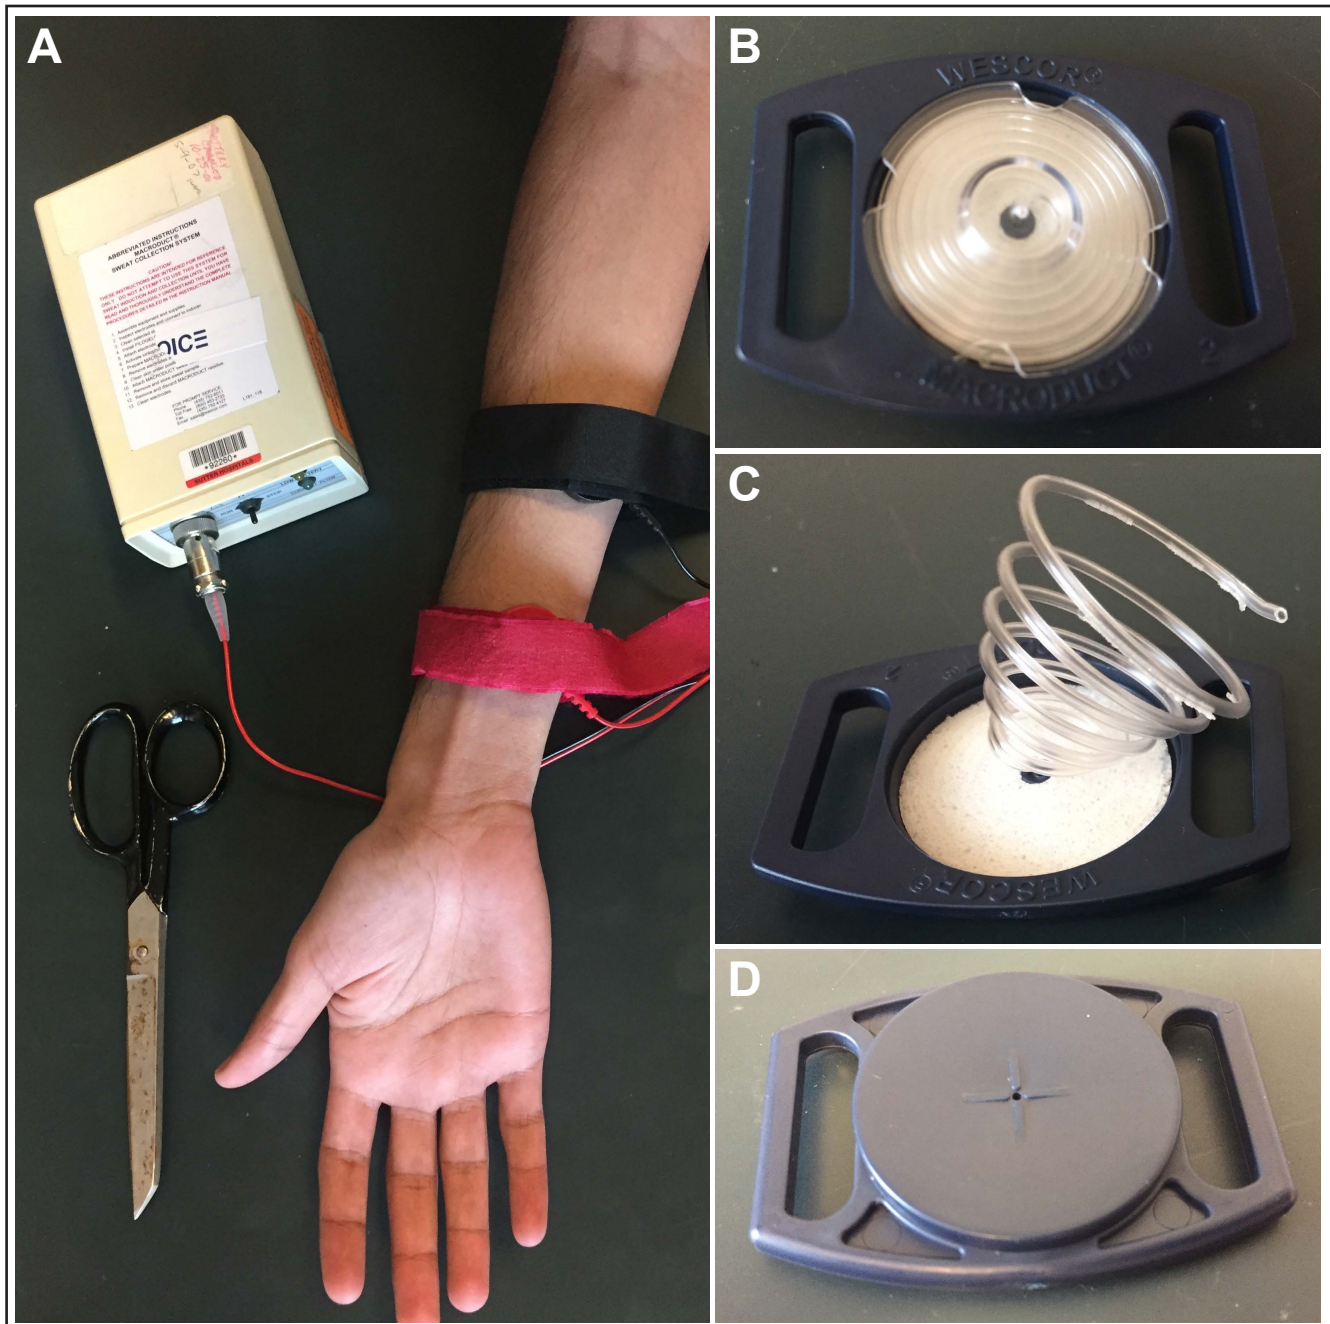

**Supplemental Fig. S1. The Macroduct® sweat collection system.** Sweat production is stimulated by pilocarpine iontophoresis using the Webster Sweat Inducer (A), which consists of two electrodes into which propriety gel disks containing pilocarpine nitrate are placed. Transdermal diffusion of pilocarpine is induced by a 1.5 mA current produced two 9 V batteries. The red (positive) electrode is placed at the desired site of sweat collection, while the black (negative) electrode must be placed within close proximity of the red electrode. Following pilocarpine iontophoresis, a propriety collector (B) is placed at the site of the red electrode for sweat collection by capillary action. Sweat is collected into capillary tubing (C) and is introduced into the tubing by a small hole present at the back of the collection device (D). For the purposes of this study, all collections took place on the volar forearm and the red electrode and collection device were placed on a 7 cm<sup>2</sup> area located within 8 cm of the wrist, as shown in the figure above (A).

# Supplemental Figure S2

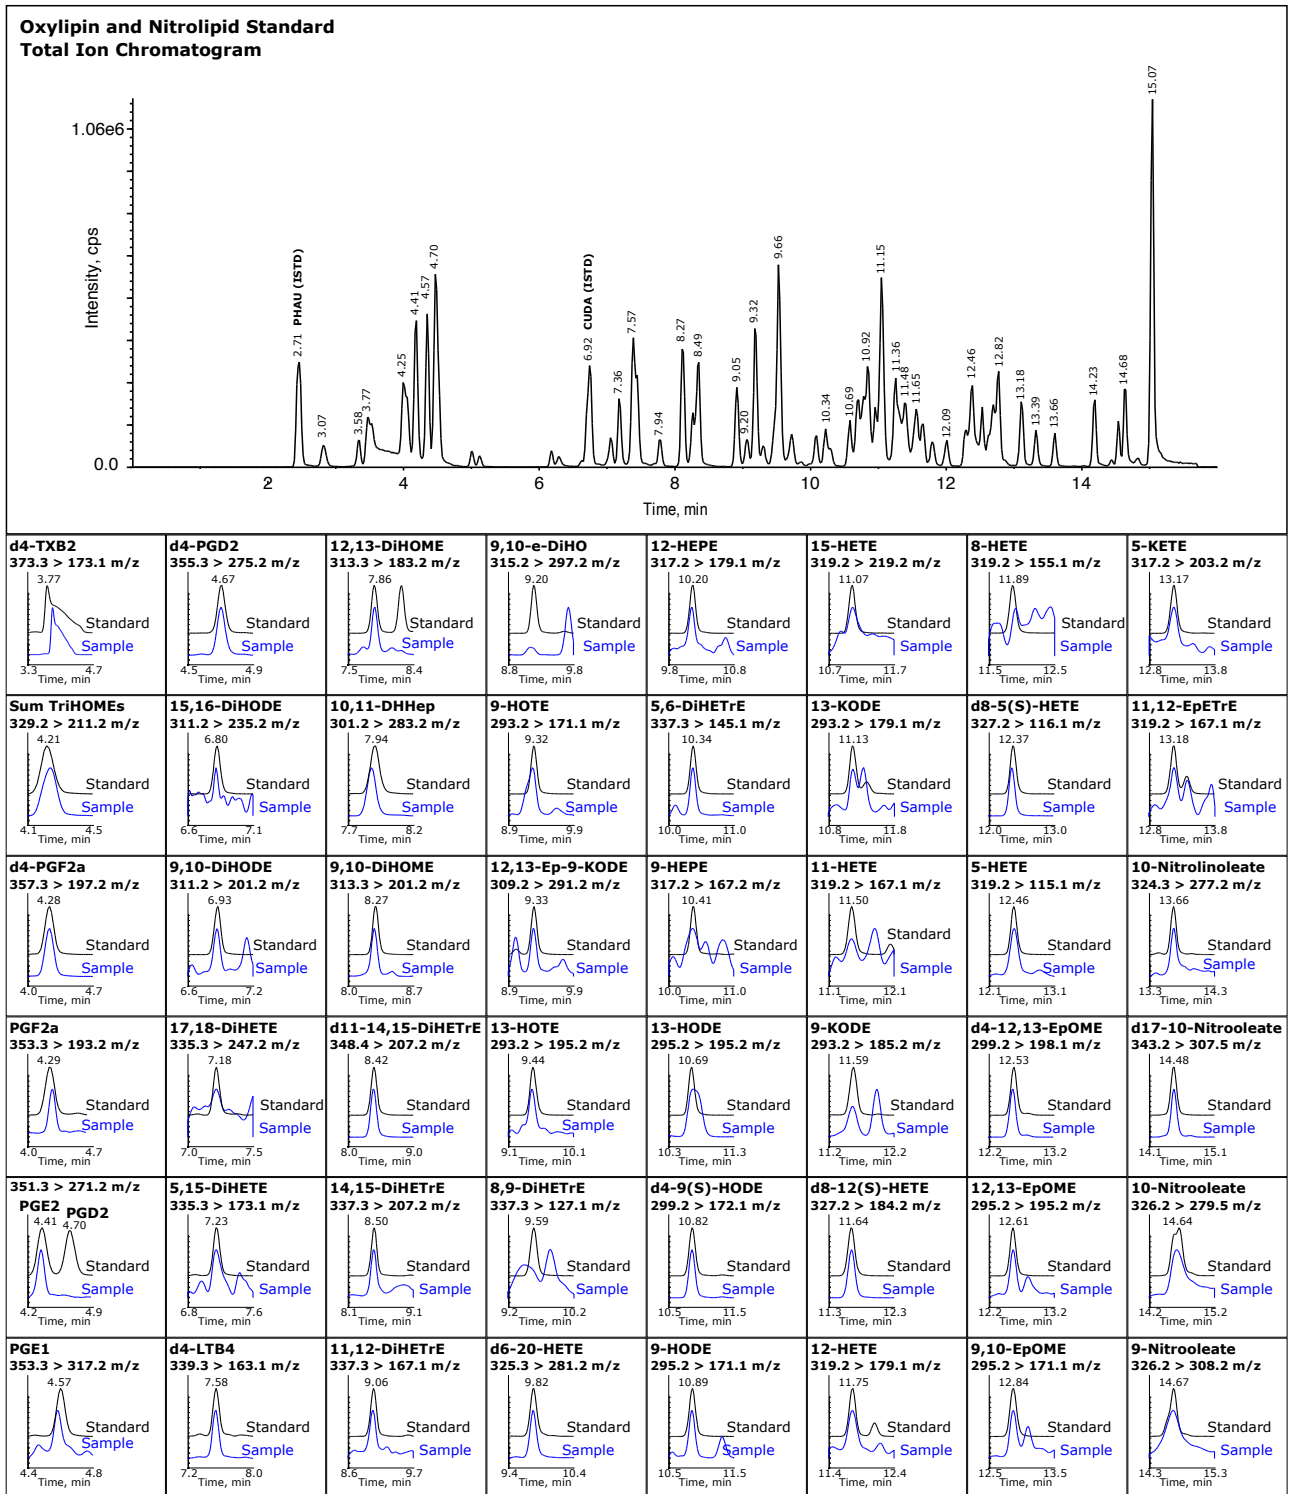

**Supplemental Fig. S2. Representative sweat oxylipin and nitrolipid chromatograms.** The total ion chromatogram is that of a representative oxylipin and nitrolipid standard to show separation of individual analytes by the UPLC-MS/MS method used in the study. The extracted ion chromatograms indicate detected oxylipins and nitrolipids in a representative sweat sample obtained from a subject with atopic dermatitis and are overlaid with extracted ion chromatograms from the representative standard to demonstrate appropriateness of peak selection in the samples.

## Supplemental Figure S3

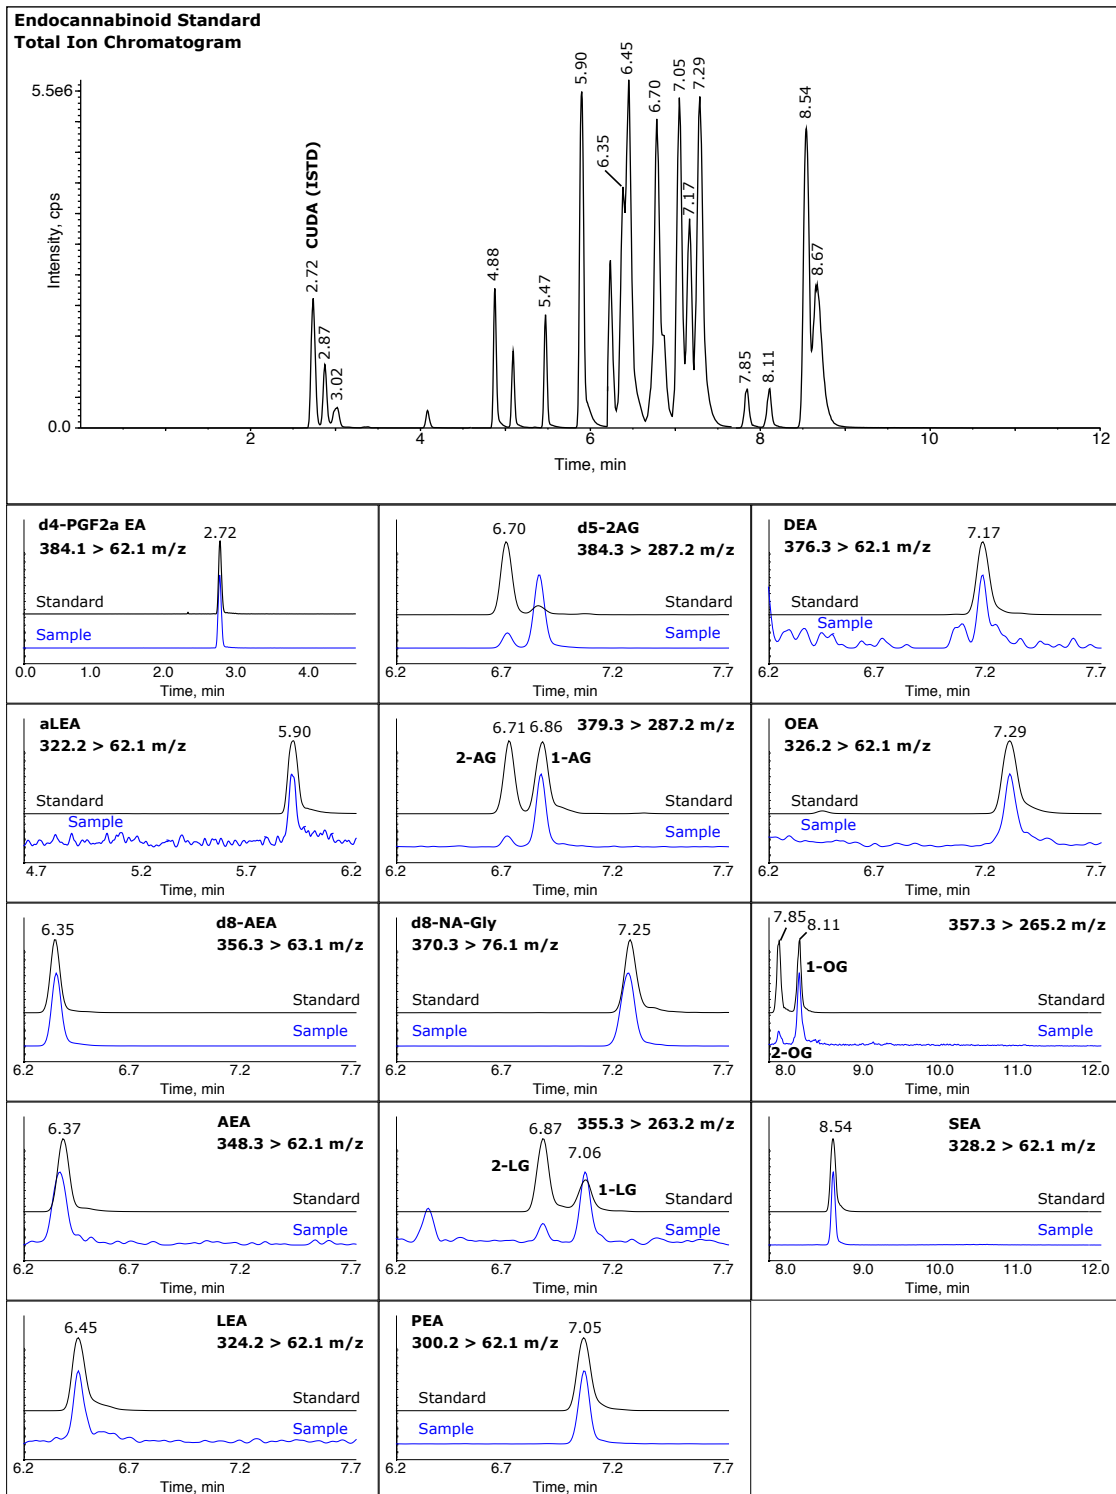

**Supplemental Fig. S3. Representative sweat endocannabinoid chromatograms.** The total ion chromatogram is that of a representative endocannabinoid standard to show separation of individual analytes by the UPLC-MS/MS method used in the study. The extracted ion chromatograms indicate detected endocannabinoids in a representative sweat sample obtained from a subject with atopic dermatitis and are overlaid with extracted ion chromatograms from the representative standard to demonstrate appropriateness of peak selection in the samples.

## Supplemental Figure S4

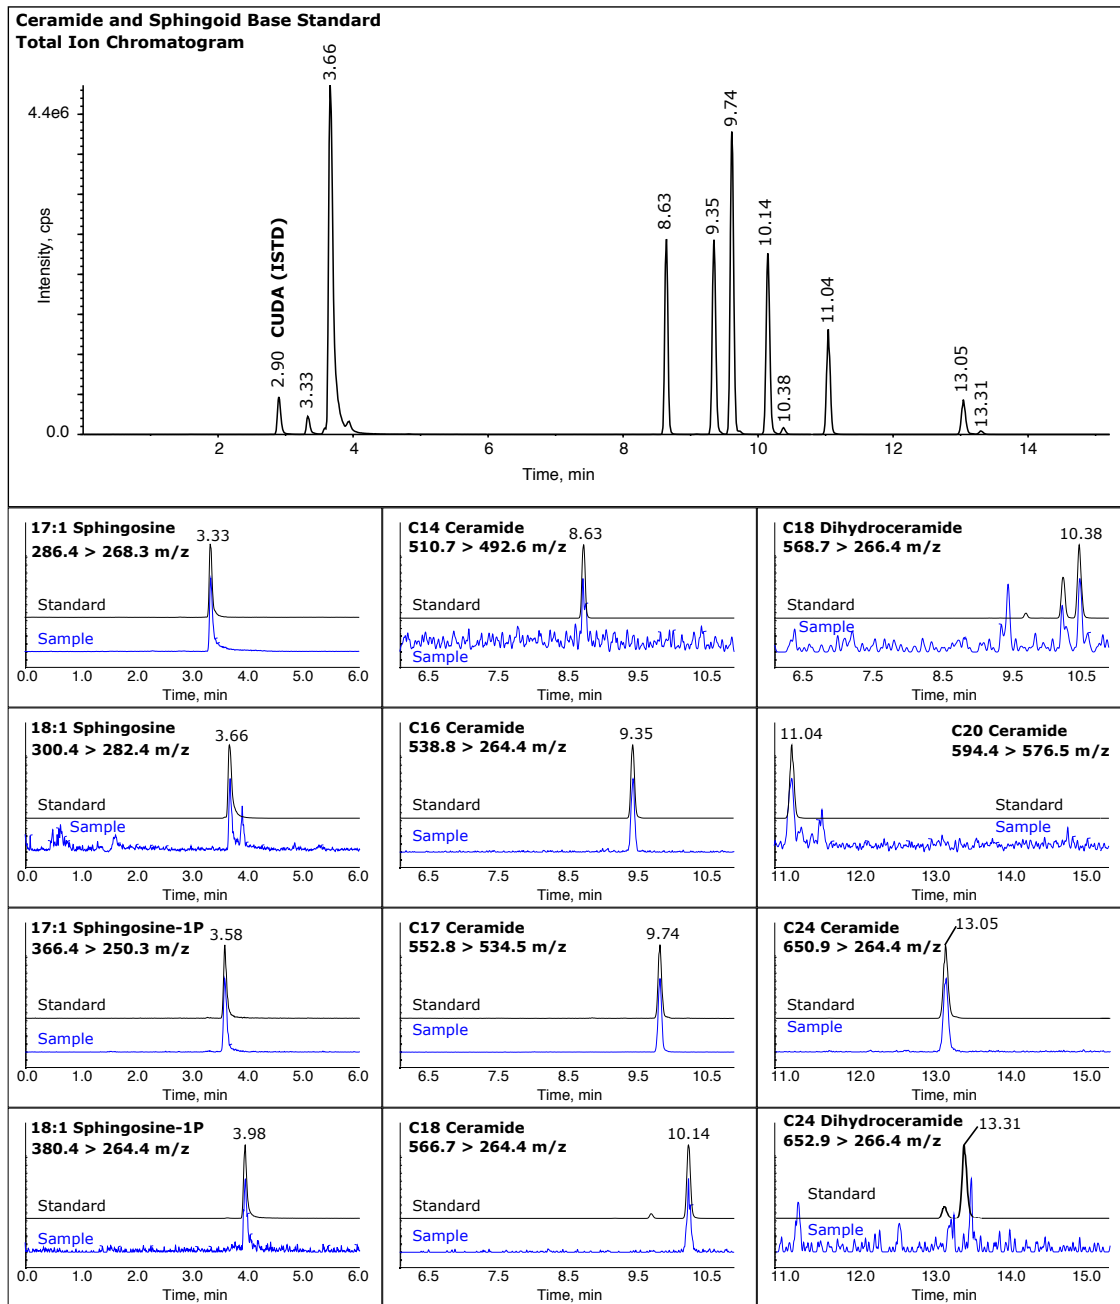

**Supplemental Fig. S4. Representative sweat ceramide and sphingoid base chromatograms.** The total ion chromatogram is that of a representative ceramide and sphingoid base standard to show separation of individual analytes by the UPLC-MS/MS method used in the study. The extracted ion chromatograms indicate detected ceramides and sphingoid bases in a representative sweat sample obtained from a subject with atopic dermatitis and are overlaid with extracted ion chromatograms from the representative standard to demonstrate appropriateness of peak selection in the samples.

## Supplemental Figure S5

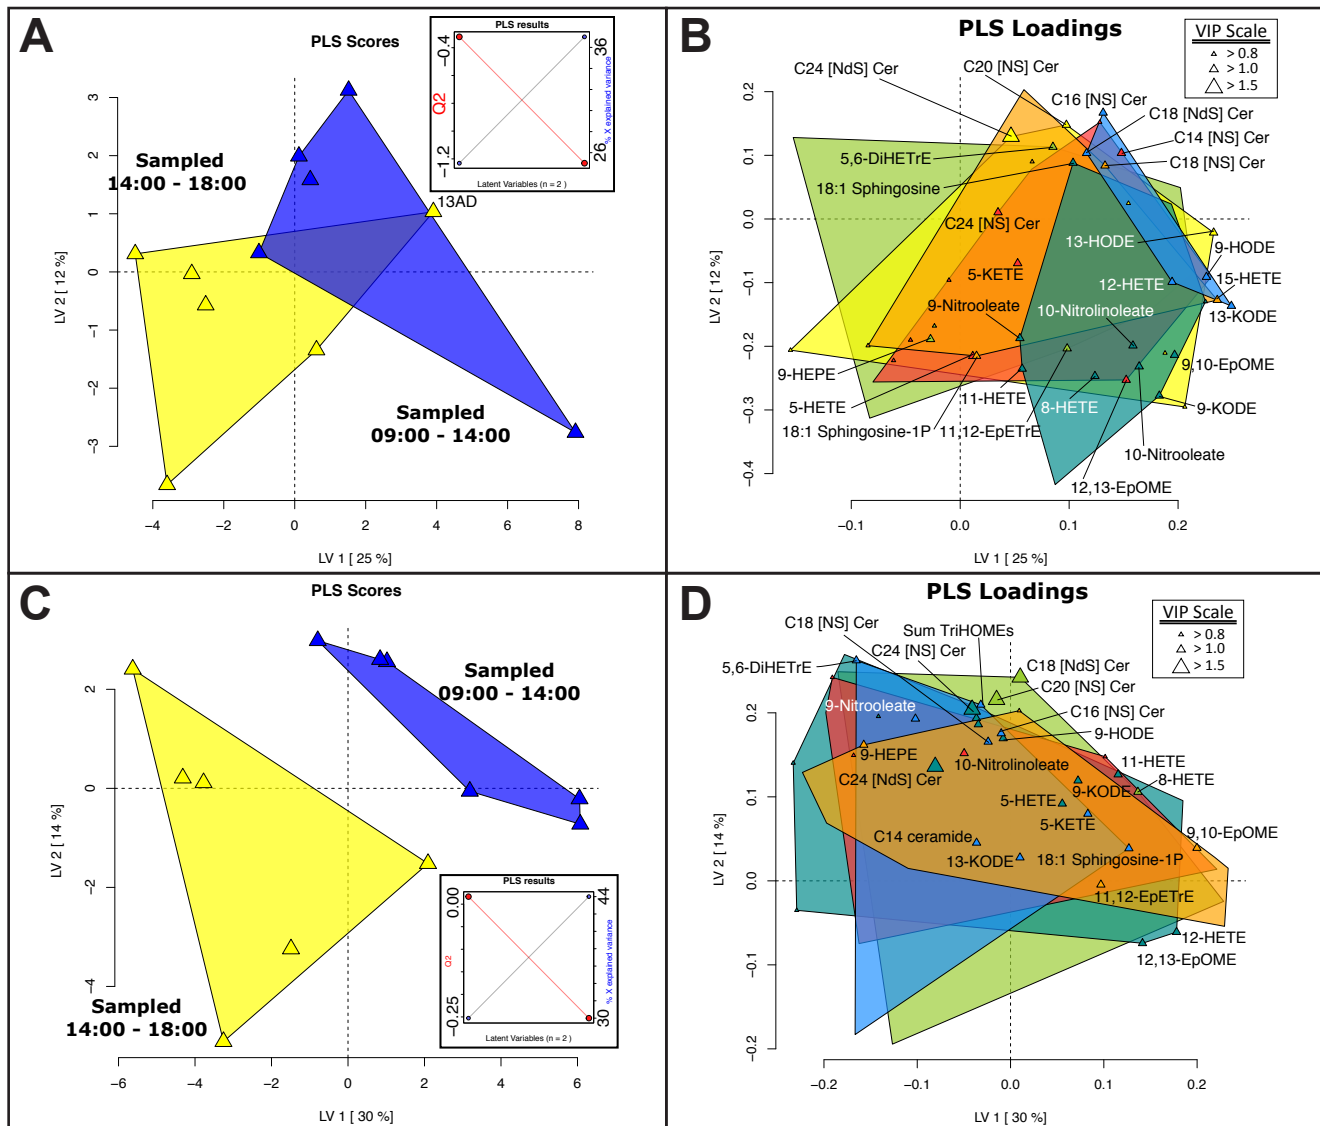

**Supplemental Fig. S5. Effect of time of sampling on eccrine sweat lipid mediators in subjects with and without atopic dermatitis.** The Partial Least Squares Discriminant Analysis (PLS-DA) Scores Plot shows apparent discrimination in subjects with (A) and without (C) AD, however negative Q2 scores (inset) indicate lack of a predictive model. (B & D) The PLS-DA Loadings Plot showing variable weight in discrimination. Point sizes are defined by the variable importance in projection (VIP) scores, with VIPs >1 considered significant factors in the discriminant model. Variables were grouped by their correlation (Spearman's  $\rho$ ) using a hierarchical cluster analysis with cluster identified by a unique color. No analytes appear different between subject groups.



## Supplemental Figure S6

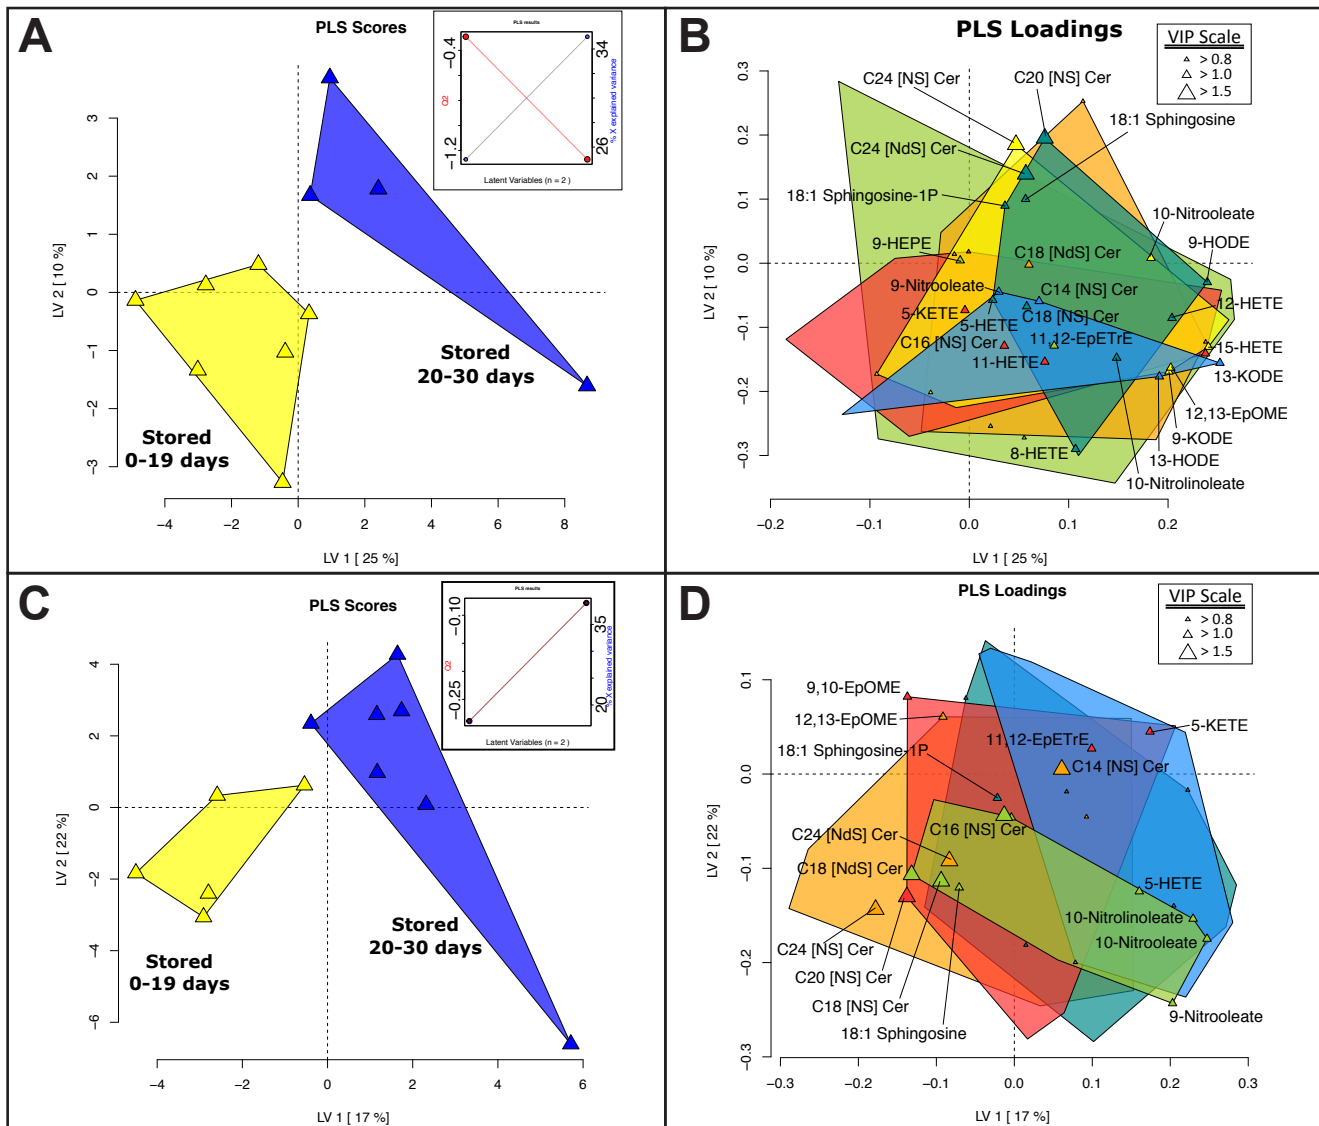

**Supplemental Fig. S6. Effect of storage time at  $-80^{\circ}\text{C}$  on eccrine sweat lipid mediators in subjects with and without atopic dermatitis.** The Partial Least Squares Discriminant Analysis (PLS-DA) Scores Plot shows apparent discrimination in subjects with (A) and without (C) AD, however negative Q2 scores (inset) indicate lack of a predictive model. (B & D) The PLS-DA Loadings Plot showing variable weight in discrimination. Point sizes are defined by the variable importance in projection (VIP) scores, with VIPs >1 considered significant factors in the discriminant model. Variables were grouped by their correlation (Spearman's  $\rho$ ) using a hierarchical cluster analysis with cluster identified by a unique color. No analytes appear different between subject groups.

## Supplemental Figure S7

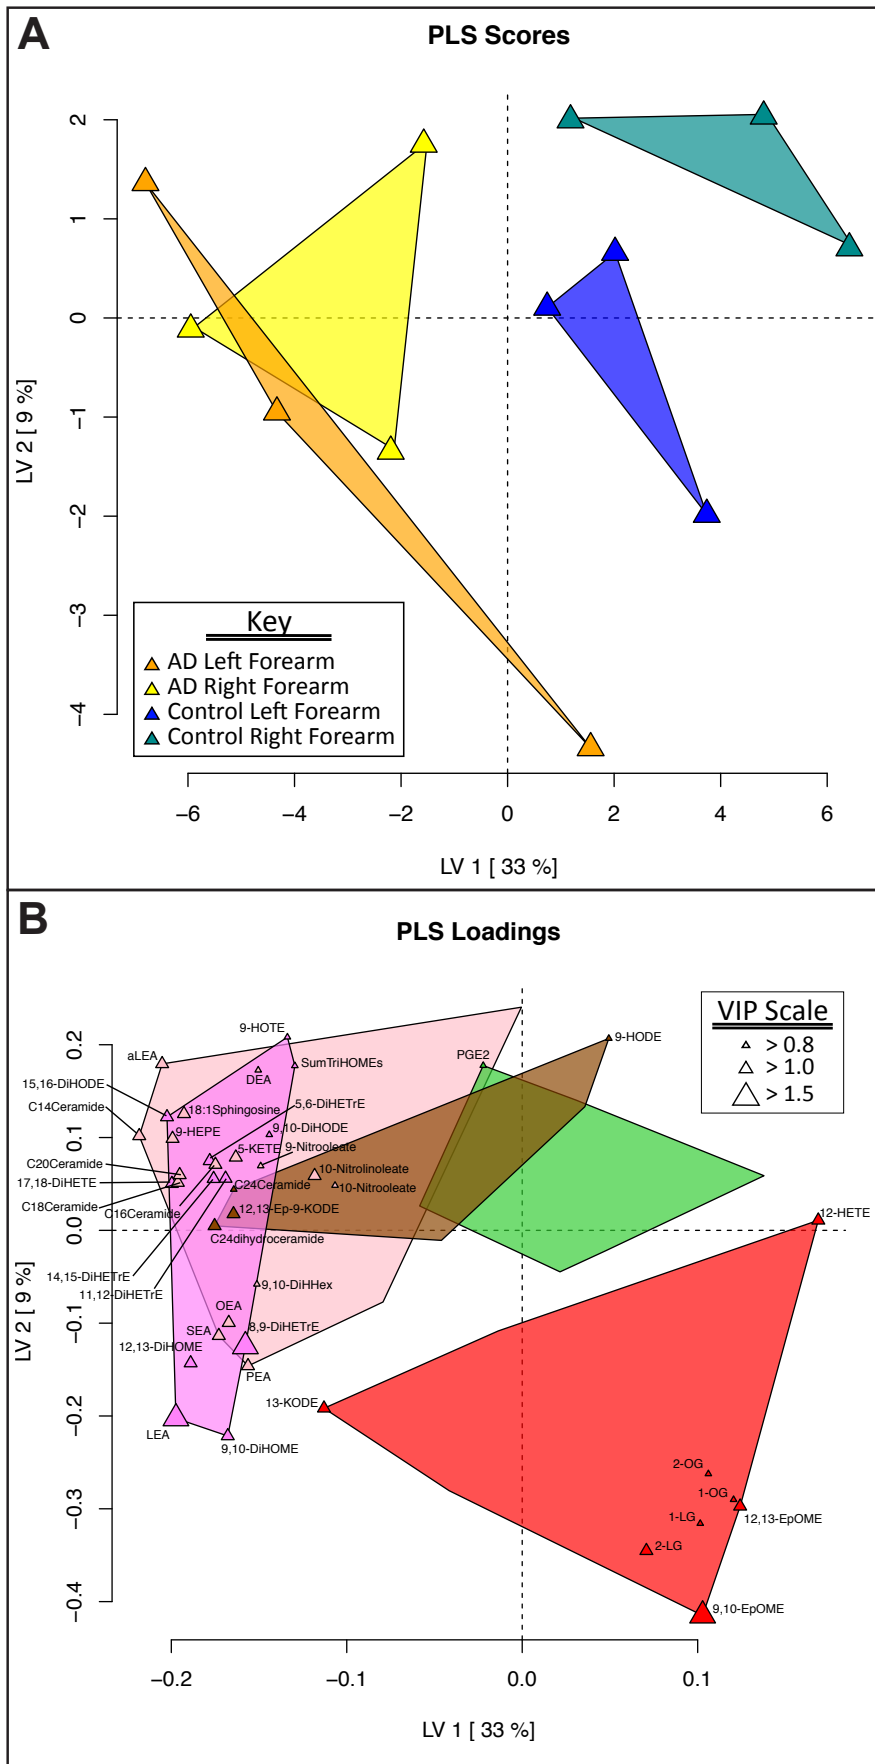

**Supplemental Fig. S7. Effect of volar forearm sampled on eccrine sweat lipid mediators in subjects with and without atopic dermatitis.** (A) The Partial Least Squares Discriminant Analysis (PLS-DA) Scores Plot shows discrimination in subjects with and without AD and apparent differences in forearm sampled for subjects without AD. Q2 scores for forearm sampled for subjects with and without AD were -0.1 and -0.2, respectively indicating lack of a predictive model. (B) The PLS-DA Loadings Plot showing variable weight in discrimination. Point sizes are defined by the variable importance in projection (VIP) scores, with VIPs >1 considered significant factors in the discriminant model. Variables were grouped by their correlation (Spearman's  $\rho$ ) using a hierarchical cluster analysis with cluster identified by a unique color. No analytes appear different between arms sampled, but subjects with atopic dermatitis show elevated ceramides and sphingoid bases.

## Supplemental Figure S8

|                |                              | Fatty Acid Chain                      |                                       |                                                 |
|----------------|------------------------------|---------------------------------------|---------------------------------------|-------------------------------------------------|
|                |                              | Non-hydroxy fatty acid<br>[N]         | $\alpha$ -hydroxy fatty acid<br>[A]   | Esterified $\omega$ -hydroxy fatty acid<br>[EO] |
| Sphingoid Base | Dihydrosphingosine<br>[dS]   | <br>[NdS] Ceramide / Cer 10<br>(8.6%) | <br>[AdS] Ceramide / Cer 11<br>(1.9%) | <br>[EOdS] Ceramide<br>(1.3%)                   |
|                | Sphingosine<br>[S]           | <br>[NS] Ceramide / Cer 2<br>(6.7%)   | <br>[AS] Ceramide / Cer 5<br>(3.8%)   | <br>[EOS] Ceramide / Cer 1<br>(5.4%)            |
|                | Phytosphingosine<br>[P]      | <br>[NP] Ceramide / Cer 3<br>(25.8%)  | <br>[AP] Ceramide / Cer 6<br>(13.4%)  | <br>[EOP] Ceramide / Cer 9<br>(2.7%)            |
|                | 6-hydroxy sphingosine<br>[H] | <br>[NH] Ceramide / Cer 8<br>(12.4%)  | <br>[AH] Ceramide / Cer 7<br>(12.4%)  | <br>[EOH] Ceramide / Cer 4<br>(5.4%)            |

**Supplemental Fig. S8. Ceramide classes and their relative abundance in healthy human epidermis.** Twelve classes of ceramides have thus far been described consisting of four possible sphingoid base moieties and three possible fatty acid chain moieties. Numbers in parentheses represent known proportions of each ceramide class in healthy human epidermis as estimated by van Smeden et al (1). Short-chain (30-40 total carbon) ceramides highlighted in orange increase in the skin of subjects with AD whereas all known chain lengths of ceramides highlighted in blue decrease in the skin of subjects with AD, as determined by Ishikawa et al and Janssens et al (2, 3). Ceramides highlighted in grey are not demonstrated to either increase or decrease in the skin of subjects with AD. This figure is adapted from Janssens et al (3).

### References

- van Smeden, J., W. A. Boiten, T. Hankemeier, R. Rissmann, J. A. Bouwstra, and R. J. Vreeken. 2014. Combined LC/MS-platform for analysis of all major stratum corneum lipids, and the profiling of skin substitutes. *Biochim. Biophys. Acta* **1841**: 70-79.
- Ishikawa, J., H. Narita, N. Kondo, M. Hotta, Y. Takagi, Y. Masukawa, T. Kitahara, Y. Takema, S. Koyano, S. Yamazaki, and A. Hatamochi. 2010. Changes in the ceramide profile of atopic dermatitis patients. *J. Invest. Dermatol.* **130**: 2511-2514.
- Janssens, M., J. van Smeden, G. S. Gooris, W. Bras, G. Portale, P. J. Caspers, R. J. Vreeken, T. Hankemeier, S. Kezic, R. Wolterbeek, A. P. Lavrijsen, and J. A. Bouwstra. 2012. Increase in short-chain ceramides correlates with an altered lipid organization and decreased barrier function in atopic eczema patients. *J. Lipid Res.* **53**: 2755-2766.

## Supplemental Table S1

**Supplemental Table S1A.** Mobile phase gradient conditions for the analysis of oxylipins and nitrolipids by UPLC-MS/MS. A Waters Acquity UPLC® BEH C18 2.1 x 150 mm, 1.7 µm column was used to separate analytes and column temperature was maintained at 60°C.

| Time (min) | Mobile Phase A <sup>a</sup> (%) | Mobile Phase B <sup>b</sup> (%) | Flow Rate (mL/min) |
|------------|---------------------------------|---------------------------------|--------------------|
| 0.00       | 75                              | 25                              | 0.25               |
| 1.00       | 60                              | 40                              | 0.25               |
| 2.50       | 58                              | 42                              | 0.25               |
| 4.50       | 50                              | 50                              | 0.25               |
| 10.50      | 35                              | 65                              | 0.25               |
| 12.50      | 25                              | 75                              | 0.25               |
| 14.00      | 15                              | 85                              | 0.25               |
| 14.50      | 5                               | 95                              | 0.25               |
| 15.00      | 75                              | 25                              | 0.25               |
| 16.00      | 75                              | 25                              | 0.25               |

<sup>a</sup> Mobile Phase A: 0.1% Acetic Acid in Water

<sup>b</sup> Mobile Phase B: 90:10 Acetonitrile:Isopropanol

Supplemental Table S1

Supplemental Table S1B. UPLC/electrospray ionization QTRAP analyte and instrument specific parameters for assayed oxylipins and nitrolipids.

| Lipid Mediator    | Analyte Class     | Fatty Acid Precursor | Internal Standard | Retention Time (min) | Q1 > Q3 Transition (m/z) | Collision Energy (V) | Declustering Potential (V) |
|-------------------|-------------------|----------------------|-------------------|----------------------|--------------------------|----------------------|----------------------------|
| PHAU              | ISTD <sup>a</sup> |                      |                   | 2.67                 | 249.2 > 130.1            | -20                  | -45                        |
| 6-keto PGF1a      | Prostanoid        | C20:4n6              | d4-PGD2           | 3.04                 | 369.3 > 163.1            | -40                  | -70                        |
| PGF3a             | Prostanoid        | C20:5n3              | d4-PGF2a          | 3.56                 | 351.3 > 307.4            | -26                  | -80                        |
| PGE3              | Prostanoid        | C20:5n3              | d4-PGF2a          | 3.69                 | 349.3 > 269.2            | -22                  | -45                        |
| d4-TXB2           | SSTD <sup>b</sup> |                      | PHAU              | 3.74                 | 373.3 > 173.1            | -25                  | -50                        |
| TXB2              | Prostanoid        | C20:4n6              | d4-TXB2           | 3.75                 | 369.3 > 169.1            | -25                  | -50                        |
| Sum TriHOMEs      | Triol             | C18:2n6              | d4-PGF2a          | 4.22                 | 329.2 > 211.2            | -32                  | -70                        |
| d4-PGF2a          | SSTD <sup>b</sup> |                      | PHAU              | 4.27                 | 357.3 > 197.2            | -35                  | -65                        |
| PGF2a             | Prostanoid        | C20:4n6              | d4-PGF2a          | 4.28                 | 353.3 > 193.2            | -35                  | -65                        |
| PGE2              | Prostanoid        | C20:4n6              | d4-PGD2           | 4.40                 | 351.3 > 271.2            | -25                  | -35                        |
| PGE1              | Prostanoid        | C20:3n6              | d4-PGD2           | 4.58                 | 353.3 > 317.2            | -22                  | -50                        |
| d4-PGD2           | SSTD <sup>b</sup> |                      | PHAU              | 4.69                 | 355.3 > 275.2            | -26                  | -45                        |
| PGD2              | Prostanoid        | C20:4n6              | d4-PGD2           | 4.71                 | 351.3 > 271.2            | -25                  | -35                        |
| 15-keto PGE2      | Prostanoid        | C20:4n6              | d4-PGD2           | 4.75                 | 349.2 > 331.3            | -16                  | -45                        |
| Resolvin D1       | Triol             | C20:4n6              | d4-PGF2a          | 5.23                 | 375.3 > 121.1            | -40                  | -50                        |
| Lipoxin A4        | Triol             | C20:4n6              | d4-PGF2a          | 5.35                 | 351.3 > 217.2            | -26                  | -50                        |
| LTB5              | Leukotriene       | C20:5n3              | d4-LTB4           | 6.40                 | 333.3 > 195.2            | -20                  | -70                        |
| 15,16-DiHODE      | Diol              | C18:3n3              | d11-14,15-DiHETrE | 6.85                 | 311.2 > 235.2            | -22                  | -65                        |
| 12,13-DiHODE      | Diol              | C18:3n3              | d11-14,15-DiHETrE | 6.93                 | 311.2 > 183.2            | -30                  | -70                        |
| 8,15-DiHETE       | Diol              | C20:5n3              | d11-14,15-DiHETrE | 6.95                 | 335.3 > 235.2            | -22                  | -65                        |
| 9,10-DiHODE       | Diol              | C18:3n3              | d11-14,15-DiHETrE | 6.98                 | 311.2 > 201.2            | -30                  | -65                        |
| 17,18-DiHETE      | Diol              | C20:5n3              | d11-14,15-DiHETrE | 7.23                 | 335.3 > 247.2            | -25                  | -60                        |
| 5,15-DiHETE       | Diol              | C20:5n3              | d11-14,15-DiHETrE | 7.28                 | 335.3 > 173.1            | -21                  | -45                        |
| 6-trans-LTB4      | Leukotriene       | C20:4n6              | d4-LTB4           | 7.40                 | 335.3 > 195.2            | -21                  | -70                        |
| 14,15-DiHETE      | Diol              | C20:5n3              | d11-14,15-DiHETrE | 7.57                 | 335.3 > 207.2            | -25                  | -55                        |
| CUDA              | ISTD <sup>a</sup> |                      |                   | 7.62                 | 339.4 > 214.2            | -35                  | -65                        |
| d4-LTB4           | SSTD <sup>b</sup> |                      | CUDA              | 7.63                 | 339.3 > 163.1            | -38                  | -70                        |
| LTB4              | Leukotriene       | C20:4n6              | d4-LTB4           | 7.67                 | 335.3 > 195.2            | -21                  | -70                        |
| 12,13-DiHOME      | Diol              | C18:2n6              | d11-14,15-DiHETrE | 7.94                 | 313.3 > 183.2            | -30                  | -70                        |
| 10,11-DHHep       | SSTD <sup>b</sup> |                      | CUDA              | 8.02                 | 301.2 > 283.2            | -30                  | -70                        |
| 9,10-DiHOME       | Diol              | C18:2n6              | d11-14,15-DiHETrE | 8.35                 | 313.3 > 201.2            | -30                  | -70                        |
| d11-14,15-DiHETrE | SSTD <sup>b</sup> |                      | CUDA              | 8.51                 | 348.4 > 207.2            | -28                  | -64                        |
| 19,20-DiHDoPA     | Diol              | C22:6n3              | d11-14,15-DiHETrE | 8.57                 | 361.3 > 273.2            | -24                  | -74                        |
| 14,15-DiHETrE     | Diol              | C20:4n6              | d11-14,15-DiHETrE | 8.60                 | 337.3 > 207.2            | -25                  | -65                        |
| 11,12-DiHETrE     | Diol              | C20:4n6              | d11-14,15-DiHETrE | 9.16                 | 337.3 > 167.1            | -27                  | -60                        |
| 9,10-e-DiHO       | Diol              | C18:0                | 10,11-DHHep       | 9.31                 | 315.2 > 297.2            | -33                  | -30                        |
| 9-HOTE            | Alcohol           | C18:3n3              | d4-9(S)-HODE      | 9.42                 | 293.2 > 171.1            | -22                  | -65                        |
| 12,13-Ep-9-KODE   | Ketone            | C18:3n3              | d4-9(S)-HODE      | 9.43                 | 309.2 > 291.2            | -20                  | -65                        |
| 13-HOTE           | Alcohol           | C18:3n3              | d4-9(S)-HODE      | 9.55                 | 293.2 > 195.2            | -25                  | -65                        |
| 8,9-DiHETrE       | Diol              | C20:4n6              | d11-14,15-DiHETrE | 9.70                 | 337.3 > 127.1            | -30                  | -55                        |
| 15-deoxy PGJ2     | Prostanoid        | C20:4n6              | d11-14,15-DiHETrE | 9.77                 | 315.2 > 271.2            | -20                  | -60                        |
| d6-20-HETE        | SSTD <sup>b</sup> |                      | CUDA              | 9.93                 | 325.3 > 281.2            | -25                  | -70                        |
| 20-HETE           | Alcohol           | C20:4n6              | d6-20-HETE        | 9.97                 | 319.2 > 275.2            | -24                  | -65                        |
| 15-HEPE           | Alcohol           | C20:5n3              | d8-12(S)-HETE     | 9.97                 | 317.2 > 219.2            | -20                  | -60                        |
| 12-HEPE           | Alcohol           | C20:5n3              | d8-12(S)-HETE     | 10.33                | 317.2 > 179.1            | -20                  | -60                        |

Supplemental Table S1

| Lipid Mediator     | Analyte Class     | Fatty Acid Precursor | Internal Standard  | Retention Time (min) | Q1 > Q3 Transition (m/z) | Collision Energy (V) | Decustering Potential (V) |
|--------------------|-------------------|----------------------|--------------------|----------------------|--------------------------|----------------------|---------------------------|
| 5,6-DiHETrE        | Diol              | C20:4n6              | d11-14,15-DiHETrE  | 10.46                | 337.3 > 145.1            | -25                  | -70                       |
| 9-HEPE             | Alcohol           | C20:5n3              | d4-9(S)-HODE       | 10.53                | 317.2 > 167.2            | -18                  | -85                       |
| 13-HODE            | Alcohol           | C18:2n6              | d4-9(S)-HODE       | 10.83                | 295.2 > 195.2            | -25                  | -65                       |
| 5-HEPE             | Alcohol           | C20:5n3              | d4-9(S)-HODE       | 10.91                | 317.2 > 115.1            | -20                  | -60                       |
| d4-9(S)-HODE       | SSTD <sup>a</sup> |                      | CUDA               | 10.95                | 299.2 > 172.1            | -26                  | -70                       |
| 9-HODE             | Alcohol           | C18:2n6              | d4-9(S)-HODE       | 11.01                | 295.2 > 171.1            | -25                  | -60                       |
| 15,16-EpODE        | Epoxide           | C18:3n3              | d4-12,13-EpOME     | 11.09                | 293.2 > 275.2            | -20                  | -60                       |
| 17,18-EpETE        | Epoxide           | C20:5n3              | d4-12,13-EpOME     | 11.19                | 317.2 > 259.2            | -15                  | -55                       |
| 15-HETE            | Alcohol           | C20:4n6              | d8-12(S)-HETE      | 11.21                | 319.2 > 219.2            | -16                  | -70                       |
| 13-KODE            | Ketone            | C18:2n6              | d4-9(S)-HODE       | 11.27                | 293.2 > 179.1            | -26                  | -70                       |
| 9,10-EpODE         | Epoxide           | C18:3n3              | d4-12,13-EpOME     | 11.28                | 293.2 > 275.2            | -20                  | -60                       |
| 17-HDoHE           | Alcohol           | C22:6n3              | d8-12(S)-HETE      | 11.32                | 343.3 > 281.2            | -20                  | -45                       |
| 12,13-EpODE        | Epoxide           | C18:3n3              | d4-12,13-EpOME     | 11.48                | 293.2 > 183.2            | -25                  | -60                       |
| 13-HpODE           | Hydroperoxide     | C18:2n6              | d4-9(S)-HODE       | 11.48                | 311.2 > 179.1            | -20                  | -40                       |
| 15-HpETE           | Hydroperoxide     | C20:4n6              | d8-12(S)-HETE      | 11.48                | 335.2 > 113.1            | -20                  | -58                       |
| 15-KETE            | Ketone            | C20:4n6              | d8-12(S)-HETE      | 11.55                | 317.2 > 273.2            | -20                  | -65                       |
| 14-HDoHE           | Alcohol           | C22:6n3              | d8-12(S)-HETE      | 11.62                | 343.3 > 281.2            | -20                  | -45                       |
| 11-HETE            | Alcohol           | C20:4n6              | d8-12(S)-HETE      | 11.64                | 319.2 > 167.1            | -15                  | -55                       |
| 14,15-EpETE        | Epoxide           | C20:5n3              | d4-12,13-EpOME     | 11.64                | 317.2 > 247.2            | -15                  | -45                       |
| 9-KODE             | Ketone            | C18:2n6              | d4-9(S)-HODE       | 11.71                | 293.2 > 185.2            | -30                  | -70                       |
| d8-12(S)-HETE      | SSTD <sup>a</sup> |                      | CUDA               | 11.78                | 327.2 > 184.2            | -21                  | -60                       |
| 11,12-EpETE        | Epoxide           | C20:5n3              | d4-12,13-EpOME     | 11.80                | 317.2 > 167.3            | -16                  | -70                       |
| 12-HETE            | Alcohol           | C20:4n6              | d8-12(S)-HETE      | 11.88                | 319.2 > 179.1            | -21                  | -60                       |
| 9-HpODE            | Hydroperoxide     | C18:2n6              | d4-9(S)-HODE       | 11.88                | 311.2 > 185.2            | -20                  | -40                       |
| 12-HpETE           | Hydroperoxide     | C20:4n6              | d8-12(S)-HETE      | 12.00                | 335.2 > 153.1            | -20                  | -58                       |
| 8-HETE             | Alcohol           | C20:4n6              | d8-12(S)-HETE      | 12.02                | 319.2 > 155.1            | -15                  | -55                       |
| 9-HETE             | Alcohol           | C20:4n6              | d8-12(S)-HETE      | 12.23                | 319.2 > 167.1            | -15                  | -55                       |
| d8-5(S)-HETE       | SSTD <sup>a</sup> |                      | CUDA               | 12.49                | 327.2 > 116.1            | -22                  | -55                       |
| 19,20-EpDPE        | Epoxide           | C22:6n3              | d4-12,13-EpOME     | 12.57                | 343.3 > 281.2            | -20                  | -45                       |
| 5-HETE             | Alcohol           | C20:4n6              | d8-5(S)-HETE       | 12.58                | 319.2 > 115.1            | -20                  | -50                       |
| d4-12(13)-EpOME    | SSTD <sup>a</sup> |                      | CUDA               | 12.65                | 299.2 > 198.1            | -25                  | -65                       |
| 12,13-EpOME        | Epoxide           | C18:2n6              | d4-12,13-EpOME     | 12.74                | 295.2 > 195.2            | -25                  | -65                       |
| 14,15-EpETrE       | Epoxide           | C20:4n6              | d4-12,13-EpOME     | 12.83                | 319.2 > 219.2            | -16                  | -70                       |
| 4-HDoHE            | Alcohol           | C22:6n3              | d8-5(S)-HETE       | 12.88                | 343.3 > 281.2            | -20                  | -45                       |
| 16,17-EpDPE        | Epoxide           | C22:6n3              | d4-12,13-EpOME     | 12.96                | 343.5 > 273.5            | -15                  | -55                       |
| 9,10-EpOME         | Epoxide           | C18:2n6              | d4-12,13-EpOME     | 12.97                | 295.2 > 171.1            | -25                  | -60                       |
| 5-HpETE            | Hydroperoxide     | C20:4n6              | d8-5(S)-HETE       | 13.18                | 335.2 > 155.1            | -20                  | -58                       |
| 5-KETE             | Ketone            | C20:4n6              | d8-5(S)-HETE       | 13.28                | 317.2 > 203.2            | -25                  | -70                       |
| 11,12-EpETrE       | Epoxide           | C20:4n6              | d4-12,13-EpOME     | 13.31                | 319.2 > 167.1            | -15                  | -55                       |
| 8,9-EpETrE         | Epoxide           | C20:4n6              | d4-12,13-EpOME     | 13.51                | 319.2 > 155.1            | -15                  | -55                       |
| 10-Nitrooleate     | Nitrolipid        | C18:2n6              | d17-10-Nitrooleate | 13.79                | 324.3 > 277.2            | -16                  | -60                       |
| d17-10-Nitrooleate | SSTD <sup>a</sup> |                      | CUDA               | 14.60                | 343.2 > 307.5            | -20                  | -70                       |
| 10-Nitrooleate     | Nitrolipid        | C18:1n9              | d17-10-Nitrooleate | 14.70                | 326.2 > 279.5            | -24                  | -60                       |
| 9-Nitrooleate      | Nitrolipid        | C18:1n9              | d17-10-Nitrooleate | 14.80                | 326.2 > 308.2            | -18                  | -70                       |

<sup>a</sup> ISTD = Internal Standard. This compound is added to the samples at the reconstitution step

<sup>b</sup> SSTD = Surrogate. This compound is added to the samples prior to extraction

## Supplemental Table S2

**Supplemental Table S2B.** Mobile phase gradient conditions for the analysis of endocannabinoids by UPLC-MS/MS. A Waters Acquity UPLC® BEH C18 2.1 x 150 mm, 1.7 µm column was used to separate analytes and column temperature was maintained at 60°C.

| Time (min) | Mobile Phase A <sup>a</sup> (%) | Mobile Phase B <sup>b</sup> (%) | Flow Rate (mL/min) |
|------------|---------------------------------|---------------------------------|--------------------|
| 0.00       | 75                              | 25                              | 0.25               |
| 0.25       | 75                              | 25                              | 0.25               |
| 0.50       | 60                              | 40                              | 0.25               |
| 1.50       | 50                              | 50                              | 0.25               |
| 3.00       | 45                              | 55                              | 0.25               |
| 3.50       | 20                              | 80                              | 0.25               |
| 8.00       | 15                              | 85                              | 0.25               |
| 9.00       | 5                               | 95                              | 0.25               |
| 9.25       | 5                               | 95                              | 0.25               |
| 9.35       | 0                               | 100                             | 0.25               |
| 10.35      | 0                               | 100                             | 0.25               |
| 10.50      | 75                              | 25                              | 0.25               |
| 12.00      | 75                              | 25                              | 0.25               |

<sup>a</sup> Mobile Phase A: 0.1% Acetic Acid in Water

<sup>b</sup> Mobile Phase B: 90:10 Acetonitrile:Isopropanol

## Supplemental Table S2

**Supplemental Table S2B.** UPLC/electrospray ionization QTRAP analyte and instrument specific parameters for assayed endocannabinoids.

| Lipid Mediator  | Analyte Class     | Fatty Acid Precursor | Internal Standard | Retention Time (min) | Q1 > Q3 Transition (m/z) | Collision Energy (V) | Declustering Potential (V) |
|-----------------|-------------------|----------------------|-------------------|----------------------|--------------------------|----------------------|----------------------------|
| PGF2a EA        | Acylethanolamide  | C20:4n6              | d4-PGF2a EA       | 2.77                 | 380.3 > 62.1             | 41                   | 55                         |
| d4-PGF2a EA     | SSTD <sup>b</sup> |                      | CUDA              | 2.77                 | 384.3 > 62.1             | 40                   | 55                         |
| PGD2 EA         | Acylethanolamide  | C20:4n6              | d4-PGF2a EA       | 2.79                 | 378.3 > 62.1             | 38                   | 58                         |
| PGE2 EA         | Acylethanolamide  | C20:4n6              | d4-PGF2a EA       | 2.91                 | 378.3 > 62.1             | 38                   | 58                         |
| PGF2a 1G        | Monoacylglycerol  | C20:4n6              | d5-2-AG           | 3.03                 | 411.3 > 301.2            | 19                   | 55                         |
| PGE2 1G         | Monoacylglycerol  | C20:4n6              | d5-2-AG           | 3.07                 | 409.3 > 317.2            | 19                   | 55                         |
| CUDA            | ISTD <sup>a</sup> |                      |                   | 4.92                 | 341.3 > 216.2            | 25                   | 58                         |
| 15-HETE EA      | Acylethanolamide  | C20:4n6              | d4-PGF2a EA       | 5.16                 | 346.3 > 62.1             | 39                   | 58                         |
| 11,12-EpETre EA | Acylethanolamide  | C20:4n6              | d4-PGF2a EA       | 5.56                 | 364.3 > 62.1             | 40                   | 58                         |
| aLEA            | Acylethanolamide  | C18:3n3              | d8-AEA            | 6.00                 | 322.2 > 62.1             | 32                   | 72                         |
| DHEA            | Acylethanolamide  | C22:6n3              | d8-AEA            | 6.35                 | 372.3 > 62.1             | 36                   | 61                         |
| d8-AEA          | SSTD <sup>b</sup> |                      | CUDA              | 6.47                 | 356.3 > 63.1             | 30                   | 60                         |
| AEA             | Acylethanolamide  | C20:4n6              | d8-AEA            | 6.50                 | 348.3 > 62.1             | 33                   | 65                         |
| LEA             | Acylethanolamide  | C18:2n6              | d8-AEA            | 6.57                 | 324.2 > 62.1             | 31                   | 72                         |
| d5-2-AG         | SSTD <sup>b</sup> |                      | CUDA              | 6.84                 | 384.3 > 287.2            | 19                   | 63                         |
| 2-AG            | Monoacylglycerol  | C20:4n6              | d5-2-AG           | 6.85                 | 379.3 > 287.2            | 19                   | 53                         |
| Dihomo GLA EA   | Acylethanolamide  | C18:3n6              | d8-AEA            | 6.92                 | 350.3 > 62.1             | 36                   | 65                         |
| 2-LG            | Monoacylglycerol  | C18:2n6              | d5-2-AG           | 7.00                 | 355.3 > 263.2            | 18                   | 52                         |
| 1-AG            | Monoacylglycerol  | C20:4n6              | d5-2-AG           | 7.00                 | 379.3 > 287.2            | 19                   | 53                         |
| d8-NA-Gly       | SSTD <sup>b</sup> |                      | CUDA              | 7.00                 | 370.3 > 76.1             | 35                   | 79                         |
| NA-Gly          | Acylamide         | C20:4n6              | d8-NA-Gly         | 7.05                 | 362.3 > 76.1             | 35                   | 79                         |
| PEA             | Acylethanolamide  | C16:0                | d8-AEA            | 7.19                 | 300.2 > 62.1             | 31                   | 80                         |
| 1-LG            | Monoacylglycerol  | C18:2n6              | d5-2-AG           | 7.20                 | 355.3 > 263.2            | 18                   | 52                         |
| DEA             | Acylethanolamide  | C22:4n6              | d8-AEA            | 7.32                 | 376.3 > 62.1             | 36                   | 66                         |
| OEA             | Acylethanolamide  | C18:1n9              | d8-AEA            | 7.44                 | 326.2 > 62.1             | 32                   | 80                         |
| 2-OG            | Monoacylglycerol  | C18:1n9              | d5-2-AG           | 8.02                 | 357.3 > 265.2            | 18                   | 52                         |
| NO-Gly          | Acylamide         | C18:1n9              | d8-NA-Gly         | 8.28                 | 340.2 > 76.2             | 26                   | 80                         |
| 1-OG            | Monoacylglycerol  | C18:1n9              | d5-2-AG           | 8.30                 | 357.3 > 265.2            | 18                   | 52                         |
| SEA             | Acylethanolamide  | C18:0                | d8-AEA            | 8.74                 | 328.2 > 62.1             | 35                   | 80                         |

<sup>a</sup> ISTD = Internal Standard. This compound is added to the samples at the reconstitution step

<sup>b</sup> SSTD = Surrogate. This compound is added to the samples prior to extraction



## Supplemental Table S3

**Supplemental Table S3C.** Mobile phase gradient conditions for the analysis of ceramides and sphingoid bases by UPLC-MS/MS. A Waters Acquity UPLC<sup>®</sup> BEH C8 2.1 x 100 mm, 1.7  $\mu$ m column was used to separate analytes and column temperature was maintained at 60°C.

| Time (min) | Mobile Phase A <sup>a</sup> (%) | Mobile Phase B <sup>b</sup> (%) | Flow Rate (mL/min) |
|------------|---------------------------------|---------------------------------|--------------------|
| 0.00       | 30                              | 70                              | 0.25               |
| 2.00       | 20                              | 80                              | 0.25               |
| 5.00       | 15                              | 85                              | 0.25               |
| 5.50       | 10                              | 90                              | 0.25               |
| 13.50      | 5                               | 95                              | 0.25               |
| 13.75      | 1                               | 99                              | 0.25               |
| 14.50      | 1                               | 99                              | 0.25               |
| 14.70      | 30                              | 70                              | 0.25               |
| 15.20      | 30                              | 70                              | 0.25               |

<sup>a</sup> Mobile Phase A: 5 mM Ammonium Formate and 0.2% Formic Acid in Water

<sup>b</sup> Mobile Phase B: 5 mM Ammonium Formate and 0.2% Formic Acid in Methanol

## Supplemental Table S3

**Supplemental Table S3B.** UPLC/electrospray ionization QTRAP analyte and instrument specific parameters for assayed ceramides and sphingoid bases.

| Lipid Mediator      | Analyte Class     | Fatty Acid Precursors <sup>a</sup> | Internal Standard   | Retention Time (min) | Q1 > Q3 Transition (m/z) | Collision Energy (V) | Decustering Potential (V) |
|---------------------|-------------------|------------------------------------|---------------------|----------------------|--------------------------|----------------------|---------------------------|
| CUDA                | ISTD <sup>b</sup> |                                    |                     | 3.02                 | 341.3 > 216.2            | 24.00                | 60                        |
| 17:1 Sphingosine    | SSTD <sup>c</sup> |                                    | CUDA                | 3.43                 | 286.4 > 268.3            | 15.00                | 40                        |
| 17:1 Sphingosine-1P | SSTD <sup>c</sup> |                                    | CUDA                | 3.69                 | 366.4 > 250.3            | 23.00                | 50                        |
| 18:1 Sphingosine    | Sphingoid Base    |                                    | 17:1 Sphingosine    | 3.76                 | 300.4 > 282.4            | 21.00                | 40                        |
| 18:0 Sphinganine-1P | Sphingoid Base    |                                    | 17:1 Sphingosine-1P | 4.03                 | 382.4 > 266.4            | 25.00                | 50                        |
| 18:1 Sphingosine-1P | Sphingoid Base    |                                    | 17:1 Sphingosine-1P | 4.03                 | 380.4 > 264.4            | 25.00                | 50                        |
| C14 Ceramide        | [NS] Ceramide     | d C18:1/C14:0                      | C17 Ceramide        | 8.82                 | 510.7 > 492.6            | 21.00                | 50                        |
| C16 Ceramide        | [NS] Ceramide     | d C18:1/C16:0                      | C17 Ceramide        | 9.54                 | 538.8 > 264.4            | 37.00                | 55                        |
| C18:1 Ceramide      | [NS] Ceramide     | d C18:1/C18:1                      | C17 Ceramide        | 9.81                 | 564.5 > 546.4            | 24.00                | 60                        |
| C17 Ceramide        | SSTD <sup>c</sup> |                                    | CUDA                | 9.94                 | 552.8 > 534.5            | 24.00                | 55                        |
| C18 Ceramide        | [NS] Ceramide     | d C18:1/C18:0                      | C17 Ceramide        | 10.3                 | 566.7 > 264.4            | 37.00                | 55                        |
| C18 dihydroceramide | [NdS] Ceramide    | d C18:0/C18:0                      | C17 Ceramide        | 10.6                 | 568.7 > 266.4            | 33.00                | 85                        |
| C20 Ceramide        | [NS] Ceramide     | d C18:1/C20:0                      | C17 Ceramide        | 11.3                 | 594.4 > 576.5            | 21.00                | 55                        |
| C24 Ceramide        | [NS] Ceramide     | d C18:1/C24:0                      | C17 Ceramide        | 13.3                 | 650.9 > 264.4            | 42.00                | 55                        |
| C24 dihydroceramide | [NdS] Ceramide    | d C18:0/C24:0                      | C17 Ceramide        | 13.6                 | 652.9 > 266.4            | 42.00                | 55                        |

<sup>a</sup> Ceramides are synthesized by the addition of a fatty acid chain (represented by the carbon chain to the right of the slash) to a sphingoid base (represented by the carbon chain to the left of the slash)

<sup>b</sup> ISTD = Internal Standard. This compound is added to the samples at the reconstitution step

<sup>c</sup> SSTD = Surrogate. This compound is added to the samples prior to extraction

Supplemental Table S4

Supplemental Table S4A. Oxylipins and nitrolipids screened for and detected in the eccrine sweat of men and women with and without atopic dermatitis.

| Lipid Mediator            | Fatty Acid Precursor | Cluster <sup>a</sup> | Concentration (nM) <sup>b</sup> |                              |                             |                              | p <sup>c</sup> |
|---------------------------|----------------------|----------------------|---------------------------------|------------------------------|-----------------------------|------------------------------|----------------|
|                           |                      |                      | Atopic Dermatitis               |                              | Control                     |                              |                |
|                           |                      |                      | Males (n=7)                     | Females (n=4)                | Males (n=7)                 | Females (n=5)                |                |
| <i>Alcohols</i>           |                      |                      |                                 |                              |                             |                              |                |
| 9-HODE                    | C18:2n6              | 4                    | 17.4 ± 14.2                     | 9.87 ± 3.11                  | 9.5 ± 6.66                  | 13.1 ± 7.02                  | 0.7            |
| 13-HODE                   | C18:2n6              | 4                    | 20.6 ± 16.2                     | 12.8 ± 6.7                   | 9.44 ± 6.65                 | 11.1 ± 4.85                  | 0.5            |
| 9-HOTE                    | C18:3n3              | 2                    | 1.03 ± 1.06                     | 0.651 ± 0.0808               | 0.536 ± 0.519               | 0.753 ± 0.186                | 0.5            |
| 13-HOTE                   | C18:3n3              | 2                    | 2.98 ± 4.57                     | 1.73 ± 0.39                  | 1.22 ± 1.11                 | 1.34 ± 0.224                 | 0.7            |
| 5-HETE                    | C20:4n6              | 1                    | 0.147 ± 0.119                   | 0.0604 ± 0.0173              | 0.0869 ± 0.0337             | 0.0604 ± 0.0252              | 0.4            |
| 8-HETE                    | C20:4n6              | 4                    | 0.283 ± 0.184 <sup>A</sup>      | 0.0946 ± 0.0459 <sup>A</sup> | 0.108 ± 0.0314 <sup>B</sup> | 0.0942 ± 0.0471 <sup>B</sup> | <b>0.05</b>    |
| 9-HETE                    | C20:4n6              |                      | ND <sup>d</sup>                 | ND                           | ND                          | ND                           |                |
| 11-HETE                   | C20:4n6              | 4                    | 0.223 ± 0.202                   | 0.114 ± 0.0632               | 0.104 ± 0.0566              | 0.0831 ± 0.0429              | 0.4            |
| 12-HETE                   | C20:4n6              | 3                    | 0.377 ± 0.294                   | 0.392 ± 0.372                | 0.393 ± 0.509               | 0.403 ± 0.287                | 0.9            |
| 15-HETE                   | C20:4n6              | 4                    | 0.648 ± 0.478                   | 0.35 ± 0.29                  | 0.884 ± 1.35                | 0.162 ± 0.059                | 0.5            |
| 20-HETE                   | C20:4n6              |                      | ND                              | ND                           | ND                          | ND                           |                |
| 5-HEPE                    | C20:5n3              |                      | ND                              | ND                           | ND                          | ND                           |                |
| 9-HEPE                    | C20:5n3              | 2                    | 0.12 ± 0.165                    | 0.0277 ± 0.0212              | 0.0353 ± 0.0322             | 0.037 ± 0.0157               | 0.4            |
| 12-HEPE                   | C20:5n3              | 4                    | 0.125 ± 0.127                   | 0.128 ± 0.146                | 0.0614 ± 0.0285             | 0.0753 ± 0.0128              | 0.7            |
| 15-HEPE                   | C20:5n3              |                      | ND                              | ND                           | ND                          | ND                           |                |
| 4-HDoHE                   | C22:6n3              |                      | ND                              | ND                           | ND                          | ND                           |                |
| 14-HDoHE                  | C22:6n3              |                      | ND                              | ND                           | ND                          | ND                           |                |
| 17-HDoHE                  | C22:6n3              |                      | ND                              | ND                           | ND                          | ND                           |                |
| <i>Diols</i>              |                      |                      |                                 |                              |                             |                              |                |
| 9,10-e-DiHO               | C18:0                | 3                    | 872 ± 2020                      | 44.2 ± 21.1                  | 180 ± 114                   | 69.4 ± 28.4                  | 0.4            |
| 9,10-DiHOME               | C18:2n6              | 2                    | 5.73 ± 4.54                     | 3.3 ± 1.22                   | 2.13 ± 1.31                 | 2 ± 0.781                    | 0.12           |
| 12,13-DiHOME <sup>e</sup> | C18:2n6              | 2                    | 0.1 ± 0.086                     | 0.0536 ± 0.0157              | 0.0495 ± 0.0379             | 0.046 ± 0.0188               | 0.4            |
| 9,10-DiHODE               | C18:3n3              | 2                    | 0.325 ± 0.37                    | 0.144 ± 0.092                | 0.0968 ± 0.107              | 0.116 ± 0.0961               | 0.4            |
| 12,13-DiHODE              | C18:3n3              |                      | ND                              | ND                           | ND                          | ND                           |                |
| 15,16-DiHODE              | C18:3n3              | 2                    | 1.55 ± 2.83                     | 0.233 ± 0.111                | 0.419 ± 0.396               | 0.46 ± 0.278                 | 0.5            |
| 5,6-DiHETrE               | C20:4n6              | 2                    | 4.14 ± 1.9                      | 3.18 ± 1.96                  | 3.06 ± 2.37                 | 3.76 ± 1                     | 0.8            |
| 8,9-DiHETrE               | C20:4n6              | 2                    | 0.928 ± 0.312                   | 0.657 ± 0.276                | 0.617 ± 0.35                | 0.773 ± 0.184                | 0.5            |
| 11,12-DiHETrE             | C20:4n6              | 2                    | 0.391 ± 0.341                   | 0.184 ± 0.151                | 0.209 ± 0.196               | 0.258 ± 0.135                | 0.5            |
| 14,15-DiHETrE             | C20:4n6              | 2                    | 0.474 ± 0.313                   | 0.233 ± 0.227                | 0.258 ± 0.264               | 0.356 ± 0.216                | 0.6            |
| 5,15-DiHETE               | C20:5n3              | 2                    | 0.135 ± 0.184                   | 0.0141 ± 0.0115              | 0.0275 ± 0.0379             | 0.0187 ± 0.0161              | 0.4            |
| 8,15-DiHETE               | C20:5n3              |                      | ND                              | ND                           | ND                          | ND                           |                |
| 14,15-DiHETE              | C20:5n3              |                      | ND                              | ND                           | ND                          | ND                           |                |
| 17,18-DiHETE              | C20:5n3              | 2                    | 1.68 ± 1.29                     | 0.656 ± 0.548                | 0.785 ± 0.848               | 1.04 ± 0.888                 | 0.5            |
| 19,20-DiHDoPA             | C22:6n3              |                      | ND                              | ND                           | ND                          | ND                           |                |

Supplemental Table S4

| Lipid Mediator        | Fatty Acid Precursor | Cluster <sup>a</sup> | Concentration (nM) <sup>b</sup> |                              |                          |                              | p <sup>c</sup> |  |
|-----------------------|----------------------|----------------------|---------------------------------|------------------------------|--------------------------|------------------------------|----------------|--|
|                       |                      |                      | Atopic Dermatitis               |                              | Control                  |                              |                |  |
|                       |                      |                      | Males (n=7)                     | Females (n=4)                | Males (n=7)              | Females (n=5)                |                |  |
| <i>Epoxides</i>       |                      |                      |                                 |                              |                          |                              |                |  |
| 9,10-EpOME            | C18:2n6              | 3                    | 1.97 ± 2.91                     | 1.09 ± 0.895                 | 0.805 ± 0.311            | 0.949 ± 0.258                | 0.9            |  |
| 12,13-EpOME           | C18:2n6              | 3                    | 0.828 ± 0.856                   | 0.998 ± 0.805                | 0.621 ± 0.311            | 0.858 ± 0.308                | 0.8            |  |
| 9,10-EpODE            | C18:3n3              |                      | ND                              | ND                           | ND                       | ND                           |                |  |
| 12,13-EpODE           | C18:3n3              |                      | ND                              | ND                           | ND                       | ND                           |                |  |
| 15,16-EpODE           | C18:3n3              |                      | ND                              | ND                           | ND                       | ND                           |                |  |
| 8,9-EpETrE            | C20:4n6              |                      | ND                              | ND                           | ND                       | ND                           |                |  |
| 11,12-EpETrE          | C20:4n6              | 1                    | 0.0601 ± 0.0709                 | 0.0121 ± 0.0142              | 0.0176 ± 0.00741         | 0.0104 ± 0.00513             | 0.5            |  |
| 14,15-EpETrE          | C20:4n6              |                      | ND                              | ND                           | ND                       | ND                           |                |  |
| 11,12-EpETE           | C20:5n3              |                      | ND                              | ND                           | ND                       | ND                           |                |  |
| 14,15-EpETE           | C20:5n3              |                      | ND                              | ND                           | ND                       | ND                           |                |  |
| 17,18-EpETE           | C20:5n3              |                      | ND                              | ND                           | ND                       | ND                           |                |  |
| 16,17-EpDPE           | C22:6n3              |                      | ND                              | ND                           | ND                       | ND                           |                |  |
| 19,20-EpDPE           | C22:6n3              |                      | ND                              | ND                           | ND                       | ND                           |                |  |
| <i>Hydroperoxides</i> |                      |                      |                                 |                              |                          |                              |                |  |
| 9-HpODE <sup>e</sup>  | C18:2n6              |                      | ND                              | ND                           | ND                       | ND                           |                |  |
| 13-HpODE <sup>e</sup> | C18:2n6              |                      | ND                              | ND                           | ND                       | ND                           |                |  |
| 5-HpETE <sup>e</sup>  | C20:4n6              |                      | ND                              | ND                           | ND                       | ND                           |                |  |
| 12-HpETE <sup>e</sup> | C20:4n6              |                      | ND                              | ND                           | ND                       | ND                           |                |  |
| 15-HpETE <sup>e</sup> | C20:4n6              |                      | ND                              | ND                           | ND                       | ND                           |                |  |
| <i>Ketones</i>        |                      |                      |                                 |                              |                          |                              |                |  |
| 9-KODE                | C18:2n6              | 4                    | 13 ± 13.2                       | 6.92 ± 5.11                  | 5.8 ± 7                  | 4.89 ± 3.87                  | 0.7            |  |
| 13-KODE               | C18:2n6              | 4                    | 5.52 ± 6.78                     | 2.77 ± 2.81                  | 1.45 ± 0.882             | 1.1 ± 0.752                  | 0.4            |  |
| 12,13-Ep-9-KODE       | C18:3n3              | 2                    | 5.68 ± 9.13                     | 1.29 ± 0.779                 | 1.15 ± 1.01              | 1.12 ± 0.464                 | 0.4            |  |
| 5-KETE                | C20:4n6              | 1                    | 0.0838 ± 0.0481                 | 0.0454 ± 0.0274              | 0.0336 ± 0.0205          | 0.0207 ± 0.0202              | 0.10           |  |
| 15-KETE               | C20:4n6              |                      | ND                              | ND                           | ND                       | ND                           |                |  |
| <i>Leukotrienes</i>   |                      |                      |                                 |                              |                          |                              |                |  |
| 6-trans-LTB4          | C20:4n6              |                      | ND                              | ND                           | ND                       | ND                           |                |  |
| LTB4                  | C20:4n6              |                      | ND                              | ND                           | ND                       | ND                           |                |  |
| LTB5                  | C20:5n3              |                      | ND                              | ND                           | ND                       | ND                           |                |  |
| <i>Nitrolipids</i>    |                      |                      |                                 |                              |                          |                              |                |  |
| 9-Nitrooleate         | C18:1n9              | 1                    | 0.531 ± 0.366                   | 0.154 ± 0.2                  | 0.643 ± 1.36             | 0.0644 ± 0.0639              | 0.2            |  |
| 10-Nitrooleate        | C18:1n9              | 1                    | 0.578 ± 0.424 <sup>A</sup>      | 0.251 ± 0.215 <sup>A,B</sup> | 1.05 ± 1.94 <sup>A</sup> | 0.0413 ± 0.0371 <sup>B</sup> | 0.02           |  |
| 10-Nitrolinoleate     | C18:2n6              | 1                    | 0.274 ± 0.218                   | 0.133 ± 0.135                | 0.156 ± 0.131            | 0.0515 ± 0.0378              | 0.3            |  |

Supplemental Table S4

| Lipid Mediator            | Fatty Acid Precursor | Cluster <sup>a</sup> | Concentration (nM) <sup>b</sup> |               |                |               | p <sup>c</sup> |
|---------------------------|----------------------|----------------------|---------------------------------|---------------|----------------|---------------|----------------|
|                           |                      |                      | Atopic Dermatitis               |               | Control        |               |                |
|                           |                      |                      | Males (n=7)                     | Females (n=4) | Males (n=7)    | Females (n=5) |                |
| <b>Prostanoids</b>        |                      |                      |                                 |               |                |               |                |
| PGE1                      | C20:3n6              | 2                    | 0.351 ± 0.214                   | 0.299 ± 0.167 | 0.164 ± 0.0896 | 0.55 ± 0.246  | 0.08           |
| PGD2                      | C20:4n6              |                      | ND                              | ND            | ND             | ND            |                |
| PGE2                      | C20:4n6              | 2                    | 1.43 ± 1.32                     | 2.04 ± 1.83   | 0.733 ± 0.754  | 4.23 ± 3.91   | 0.2            |
| 15-keto PGE2              | C20:4n6              |                      | ND                              | ND            | ND             | ND            |                |
| 6-keto PGF1a              | C20:4n6              |                      | ND                              | ND            | ND             | ND            |                |
| PGF2a                     | C20:4n6              | 2                    | 0.408 ± 0.313                   | 0.273 ± 0.183 | 0.124 ± 0.117  | 0.225 ± 0.154 | 0.4            |
| 15-deoxy PGJ2             | C20:4n6              |                      | ND                              | ND            | ND             | ND            |                |
| TXB2                      | C20:4n6              |                      | ND                              | ND            | ND             | ND            |                |
| PGE3                      | C20:5n3              |                      | ND                              | ND            | ND             | ND            |                |
| PGF3a                     | C20:5n3              |                      | ND                              | ND            | ND             | ND            |                |
| <b>Triols</b>             |                      |                      |                                 |               |                |               |                |
| Sum TriHOMEs <sup>f</sup> | C18:2n6              | 2                    | 89.4 ± 118                      | 25.3 ± 12.6   | 15.1 ± 8.07    | 25.3 ± 7.47   | 0.08           |
| Lipoxin A4                | C20:4n6              |                      | ND                              | ND            | ND             | ND            |                |
| Resolvin D1               | C20:4n6              |                      | ND                              | ND            | ND             | ND            |                |

<sup>a</sup> Analytes were clustered by Spearman's  $\rho$  correlation coefficients using the Minkowski distance and Ward agglomeration

<sup>b</sup> Values are reported as Mean ± Standard Deviation. Upper-case superscript letters indicate differences between group means as determined by one-way ANOVA with Tukey's post-hoc HSD.

<sup>c</sup> The reported p values are false detection rate-corrected at  $q = 0.05$

<sup>d</sup> ND= Not Detected

<sup>e</sup> Analytes are evaluated on a semi-quantitative basis due to lack of authentic standards

<sup>f</sup> This analyte represents the sum of the peaks of all observed isomers of the linoleate-derived triols. Concentrations were calculated relative to concentrations of authentic 9,12,13-TriHOME standards

Supplemental Table S4

Supplemental Table S4B. Endocannabinoids screened for and detected in the eccrine sweat of men and women with and without atopic dermatitis.

| Lipid Mediator           | Fatty Acid Precursor | Cluster <sup>a</sup> | Concentration (nM) <sup>b</sup> |                |                 |                   | p <sup>c</sup> |
|--------------------------|----------------------|----------------------|---------------------------------|----------------|-----------------|-------------------|----------------|
|                          |                      |                      | Atopic Dermatitis               |                | Control         |                   |                |
|                          |                      |                      | Males (n=7)                     | Females (n=4)  | Males (n=7)     | Females (n=5)     |                |
| <b>Acylethanolamides</b> |                      |                      |                                 |                |                 |                   |                |
| PEA                      | C16:0                | 1                    | 3.62 ± 2.22                     | 2.47 ± 2.18    | 3.26 ± 4.21     | 12.6 ± 27.7       | 0.8            |
| SEA                      | C18:0                | 1                    | 4.45 ± 4.49                     | 2.78 ± 2.56    | 2.95 ± 3.55     | 13.5 ± 29.5       | 0.8            |
| OEA                      | C18:1n9              | 1                    | 0.46 ± 0.466                    | 0.32 ± 0.176   | 0.73 ± 1.56     | 0.109 ± 0.174     | 0.3            |
| LEA                      | C18:2n6              | 1                    | 0.0825 ± 0.036                  | 0.066 ± 0.0175 | 0.122 ± 0.201   | 0.0305 ± 0.0242   | 0.5            |
| aLEA                     | C18:3n3              | 1                    | 0.0313 ± 0.0203                 | 0.0128 ± 0.013 | 0.0245 ± 0.0362 | 0.00632 ± 0.0044  | 0.11           |
| Dihomo GLA EA            | C18:3n6              |                      | ND <sup>d</sup>                 | ND             | ND              | ND                |                |
| 11,12-EpETre EA          | C20:4n6              |                      | ND                              | ND             | ND              | ND                |                |
| 15-HETE EA               | C20:4n6              |                      | ND                              | ND             | ND              | ND                |                |
| AEA                      | C20:4n6              | 2                    | 0.0465 ± 0.0536                 | 0.02 ± 0.0113  | 0.0384 ± 0.0406 | 0.0173 ± 0.00956  | 0.6            |
| PGD2 EA                  | C20:4n6              |                      | ND                              | ND             | ND              | ND                |                |
| PGE2 EA                  | C20:4n6              |                      | ND                              | ND             | ND              | ND                |                |
| PGF2a EA                 | C20:4n6              |                      | ND                              | ND             | ND              | ND                |                |
| DEA                      | C22:4n6              | 1                    | 0.0339 ± 0.0236                 | 0.022 ± 0.0156 | 0.0317 ± 0.0518 | 0.00485 ± 0.00434 | 0.3            |
| DHEA                     | C22:6n3              |                      | ND                              | ND             | ND              | ND                |                |
| <b>Monoacylglycerols</b> |                      |                      |                                 |                |                 |                   |                |
| 1-OG                     | C18:1n9              | 3                    | 15300 ± 39100                   | 405 ± 614      | 816 ± 988       | 118 ± 99          | 0.7            |
| 2-OG                     | C18:1n9              | 3                    | 2000 ± 5110                     | 43.4 ± 59.3    | 108 ± 132       | 14.1 ± 11.2       | 0.8            |
| 1-LG                     | C18:2n6              | 3                    | 2590 ± 6200                     | 120 ± 165      | 146 ± 177       | 34.5 ± 25.3       | 0.7            |
| 2-LG                     | C18:2n6              | 3                    | 234 ± 551                       | 19.8 ± 27.2    | 20.6 ± 26.2     | 5.37 ± 3.67       | 0.8            |
| 1-AG                     | C20:4n6              | 3                    | 476 ± 1210                      | 57.7 ± 25.5    | 36.6 ± 41.7     | 20.1 ± 15.2       | 0.8            |
| 2-AG                     | C20:4n6              | 3                    | 65 ± 164                        | 9.16 ± 5.24    | 6.48 ± 6.41     | 2.55 ± 1.81       | 0.8            |
| PGE2 1G                  | C20:4n6              |                      | ND                              | ND             | ND              | ND                |                |
| PGF2a 1G                 | C20:4n6              |                      | ND                              | ND             | ND              | ND                |                |
| <b>Acylamides</b>        |                      |                      |                                 |                |                 |                   |                |
| NO-Gly                   | C18:1n9              |                      | ND                              | ND             | ND              | ND                |                |
| NA-Gly                   | C20:4n6              |                      | ND                              | ND             | ND              | ND                |                |

<sup>a</sup> Analytes were clustered by Spearman's ρ correlation coefficients using the Minkowski distance and Ward agglomeration

<sup>b</sup> Values are reported as Mean ± Standard Deviation. Superscript letters indicate differences between group means as determined by one-way ANOVA with Tukey's post-hoc HSD.

<sup>c</sup> The reported p values are false detection rate-corrected at q = 0.05

<sup>d</sup> ND= Not Detected

Supplemental Table S4

Supplemental Table S4C. Ceramides and sphingoid bases screened for and detected in the eccrine sweat of men and women with and without atopic dermatitis.

| Lipid Mediator         | Fatty Acid Precursor <sup>a</sup> | Cluster <sup>b</sup> | Concentration (nM) <sup>c</sup> |                             |                            |                            | p <sup>d</sup> |
|------------------------|-----------------------------------|----------------------|---------------------------------|-----------------------------|----------------------------|----------------------------|----------------|
|                        |                                   |                      | Atopic Dermatitis               |                             | Control                    |                            |                |
|                        |                                   |                      | Males (n=5)                     | Females (n=4)               | Males (n=5)                | Females (n=5)              |                |
| <b>[NdS] Ceramides</b> |                                   |                      |                                 |                             |                            |                            |                |
| C18 dihydroceramide    | d C18:0/C18:0                     | 5                    | 0.822 ± 0.304 <sup>A</sup>      | 0.335 ± 0.123 <sup>B</sup>  | 0.265 ± 0.126 <sup>B</sup> | 0.289 ± 0.131 <sup>B</sup> | <b>0.003</b>   |
| C24 dihydroceramide    | d C18:0/C24:0                     | 5                    | 7.2 ± 5.99 <sup>A</sup>         | 2.79 ± 2.13 <sup>AB</sup>   | 0.889 ± 0.334 <sup>B</sup> | 1.93 ± 1.16 <sup>B</sup>   | <b>0.006</b>   |
| <b>[NS] Ceramides</b>  |                                   |                      |                                 |                             |                            |                            |                |
| C14 Ceramide           | d C18:1/C14:0                     | 5                    | 1.99 ± 1.81 <sup>A</sup>        | 0.463 ± 0.185 <sup>AB</sup> | 0.273 ± 0.236 <sup>B</sup> | 0.373 ± 0.25 <sup>AB</sup> | <b>0.02</b>    |
| C16 Ceramide           | d C18:1/C16:0                     | 5                    | 10.6 ± 4.08 <sup>A</sup>        | 3.45 ± 1.44 <sup>B</sup>    | 2.44 ± 1.54 <sup>B</sup>   | 3.33 ± 1.71 <sup>B</sup>   | <b>0.0008</b>  |
| C18 Ceramide           | d C18:1/C18:0                     | 5                    | 2.51 ± 1.15 <sup>A</sup>        | 0.898 ± 0.33 <sup>AB</sup>  | 0.339 ± 0.167 <sup>B</sup> | 0.649 ± 0.189 <sup>B</sup> | <b>0.0008</b>  |
| C18:1 Ceramide         | d C18:1/C18:1                     |                      | ND <sup>e</sup>                 | ND                          | ND                         | ND                         |                |
| C20 Ceramide           | d C18:1/C20:0                     | 5                    | 3.5 ± 1.91 <sup>A</sup>         | 1.41 ± 0.72 <sup>AC</sup>   | 0.489 ± 0.256 <sup>B</sup> | 1.08 ± 0.399 <sup>BC</sup> | <b>0.0008</b>  |
| C24 Ceramide           | d C18:1/C24:0                     | 5                    | 9.82 ± 5.67 <sup>A</sup>        | 3.28 ± 2.18 <sup>B</sup>    | 1.25 ± 0.519 <sup>B</sup>  | 2.6 ± 0.977 <sup>B</sup>   | <b>0.0008</b>  |
| <b>Sphingoid Bases</b> |                                   |                      |                                 |                             |                            |                            |                |
| 18:0 Sphinganine-1P    |                                   |                      | ND                              | ND                          | ND                         | ND                         |                |
| 18:1 Sphingosine       |                                   | 5                    | 31.1 ± 16 <sup>A</sup>          | 9.05 ± 3.84 <sup>B</sup>    | 3.16 ± 2.75 <sup>B</sup>   | 6.27 ± 2.63 <sup>B</sup>   | <b>0.0008</b>  |
| 18:1 Sphingosine-1P    |                                   | 1                    | 28.6 ± 24.7                     | 7.96 ± 4.26                 | 9.58 ± 9.21                | 5.7 ± 3.86                 | 0.12           |

<sup>a</sup> Ceramides are synthesized by the addition of a fatty acid chain (represented by the carbon chain to the right of the slash) to a sphingoid base (represented by the carbon chain to the left of the slash)

<sup>b</sup> Analytes were clustered by Spearman's  $\rho$  correlation coefficients using the Minkowski distance and Ward agglomeration

<sup>c</sup> Values are reported as Mean ± Standard Deviation. Superscript letters indicate differences between group means as determined by one-way ANOVA with Tukey's post-hoc HSD.

<sup>d</sup> The reported p values are false detection rate-corrected at  $q = 0.05$

<sup>e</sup> ND= Not Detected

**Supplemental Table S5**

**Supplemental Table S5.** Impact of storage and sampling conditions used on eccrine sweat lipid mediators in subjects without atopic dermatitis. Samples were stored at -80°C for 0-19 days or 20-30 days, and subjects were sampled between 09:00-14:00 or 14:00-18:00, respectively. Eccrine sweat lipid mediators in subjects with atopic dermatitis were unaffected by sampling and storage conditions.

| Lipid Mediator                   | Fatty Acid Precursor |         | Storage Time (n = 5/7)    |                              | Sampling Time (n = 6/6)   |                              |
|----------------------------------|----------------------|---------|---------------------------|------------------------------|---------------------------|------------------------------|
|                                  |                      |         | Unadjusted p <sup>a</sup> | FDR-Corrected p <sup>b</sup> | Unadjusted p <sup>a</sup> | FDR-Corrected p <sup>b</sup> |
| <b>Endocannabinoids</b>          |                      |         |                           |                              |                           |                              |
| <i>Acylethanolamides</i>         |                      |         |                           |                              |                           |                              |
|                                  | PEA                  | C16:0   | <b>0.04</b>               | 0.62                         | 0.06                      | 0.32                         |
|                                  | SEA                  | C18:0   | <b>0.05</b>               | 0.62                         | 0.06                      | 0.32                         |
| <i>Monoacylglycerols</i>         |                      |         |                           |                              |                           |                              |
|                                  | 1-OG                 | C18:1n9 | 0.93                      | 0.96                         | <b>0.02</b>               | 0.32                         |
|                                  | 2-OG                 | C18:1n9 | 0.84                      | 0.92                         | <b>0.04</b>               | 0.32                         |
|                                  | 1-LG                 | C18:2n6 | 0.83                      | 0.92                         | <b>0.03</b>               | 0.32                         |
|                                  | 2-LG                 | C18:2n6 | 0.84                      | 0.92                         | <b>0.04</b>               | 0.32                         |
|                                  | 1-AG                 | C20:4n6 | 0.72                      | 0.92                         | <b>0.03</b>               | 0.32                         |
|                                  | 2-AG                 | C20:4n6 | 0.77                      | 0.92                         | <b>0.04</b>               | 0.32                         |
| <b>Oxylipins and Nitrolipids</b> |                      |         |                           |                              |                           |                              |
| <i>Diols</i>                     |                      |         |                           |                              |                           |                              |
|                                  | 9,10-DiHHex          | C16:0   | 0.08                      | 0.73                         | <b>0.03</b>               | 0.32                         |
| <i>Epoxides</i>                  |                      |         |                           |                              |                           |                              |
|                                  | 9,10-EpO             | C18:0   | 0.30                      | 0.89                         | <b>0.05</b>               | 0.32                         |
| <i>Ketones</i>                   |                      |         |                           |                              |                           |                              |
|                                  | 13-KODE              | C18:2n6 | <b>0.02</b>               | 0.47                         | 0.98                      | 0.98                         |
|                                  | 12,13-Ep-9-KODE      | C18:3n3 | 0.28                      | 0.88                         | <b>0.01</b>               | 0.32                         |
| <i>Prostanoids</i>               |                      |         |                           |                              |                           |                              |
|                                  | PGE1                 | C20:3n6 | <b>0.01</b>               | 0.47                         | 0.91                      | 0.94                         |
|                                  | PGE2                 | C20:4n6 | <b>0.02</b>               | 0.47                         | 0.74                      | 0.94                         |

<sup>a</sup>The reported p values were determined by Student's t-test, and are unadjusted for multiple comparisons

<sup>b</sup>The reported p values adjust the p values from the preceding column for multiple comparisons by a false discovery rate correction (q = 0.05)
